# Supplementary material for: Compound Flooding in Convergent Estuaries: Insights from an Analytical Model
Source: Copernicus journal article supplement (doi:10.5194/os-2022-9), 2022-02-18
Supplement: Supplementary file [file os-2022-9-RC2-supplement.pdf]

### General comments

The manuscript discusses compound flooding using an analytical model after validating the model with an idealized hydrodynamic model. The authors conducted sensitivity tests and investigated what the important factors for compound flooding are. The methods are appropriate and the results are interesting, but my concern with the manuscript is seemingly lack of novelty. The analytical model has already been developed and the results are mostly in line with the past literature. Some results are new, but they don't look like scientifically novel. Also, an equally concern is lack of "quantitative" analysis. The authors presented the results, but did not seem to quantitatively discuss the results in depth. e.g. comparison between analytical and numerical models in terms of their capabilities and caveats and the relative importance of depth, friction, river discharge, convergence length etc. on the resulting compound surge levels. It should be possible to rank them to discuss further quantitatively what's the most/least important and why. Use of analytical model enables you to do such analysis. Given that, although this manuscript is supposed to discuss the insights of compound flooding, I am not convinced that this manuscript provides the insights. I suggest the authors to include more quantitative analysis of the model results and discussion of the findings.

Also, I strongly recommend the authors to add a table on all model parameters with number as well as a table or glossary for **all variables** with unit you used in the manuscript and be consistent throughout the texts. I was struggling to read this manuscript due to inconsistency of the variables and confusion of their use. In addition, it's better to be more specific about the variables you use in the text such as "waves" as you include multiple waves (primary/secondary surge and tides) or assign unique variables (I recommend the latter). I was having difficulty reading the manuscript because it's not clear to me for example what waves the authors are referring to.

In conclusion, this manuscript will need more work to be published as it is and I suggest the authors to make a major revision.

### Specific comments for each section

1. **Introduction:** It is not clear to me as to what's the missing pieces of compound flooding studies, which motivate your study and what's the advantage and limitation of your analytical model over numerical model. This should be addressed in introduction or in method section.
2. **Methodology:** The method section includes the analysis of some model results (section 2.2) as well as the description of the analytical model and validation. Those should be separated so I suggest to move a portion of the section 2.2 to section 3; then, maybe section 3-5 can be combined with the portion.
3. I suggest adding a table including name, unit, and variable of all model parameters (e.g.  $B_g$ ,  $B_0$ ,  $dx$ , domain size, run time, frequency, amplitude, and phase of surges and M2 tide,  $C_d$ , depth, etc.). Table 1 includes some, but it is incomplete and should be put near Figure 1.
4. **Results and discussion:** As for section 3-5, I don't understand why you need another model comparison as you already have one. Also, this is a new configuration compared

to the one used in texts, which should be explained prior to the results/discussions (e.g. methodology). The section provides the results which were not presented in section 2-2; however, I am not convinced that the authors need this section as a separate section. Maybe the author can think about combining section 2-3 and 3-5. Just merging 3-5 into 2-3 does not seem to work. In addition, I suggest that the authors should include in-depth analysis of the model results and their comparison with the numerical model and other similar studies to discuss the analytical model.

#### Line-by-line comments

| # | Line #                            | Sentence                       | Comments                                                                                                                                                                                                                                                                                                |
|---|-----------------------------------|--------------------------------|---------------------------------------------------------------------------------------------------------------------------------------------------------------------------------------------------------------------------------------------------------------------------------------------------------|
| 1 | 94, 98                            | Non-stationarity               | I am a bit confused about the word, non-stationary (or non-stationarity) as this manuscript does not discuss non-stationarity (changing conditions over time) much. Please clarify.                                                                                                                     |
| 2 | 149                               | A is channel cross-section     | A is channel cross-sectional area?                                                                                                                                                                                                                                                                      |
| 3 | 145,146,161, 165,173,187, 239,252 | Equations 1-8                  | Each variable should have unit in texts.                                                                                                                                                                                                                                                                |
| 4 | 153                               | $L_e$                          | Have you defined $L_e$ prior to the equation? If not, please define.                                                                                                                                                                                                                                    |
| 5 | 157                               | Tidal amplitude to depth ratio | $\xi$ was defined as tidal water level elevation on line 149 so the ratio is not amplitude/depth, but tidal elevation or tidal level/depth.                                                                                                                                                             |
| 6 | 161, 166                          | Equation 3 and $U_R+U_T$       | Define $U_R$ and $U_T$ . Are they different from $u_R$ and $u_T$ ? If not, the authors should use the variables consistently. I suggest the authors to check all variables in the manuscript to make sure that they are consistent.                                                                     |
| 7 | 166                               | $U_{(x)}$                      | Is upper case U, the maximum value of current and I wonder the same applies to $U_R$ and $U_T$ ? Nothing was mentioned in text.                                                                                                                                                                         |
| 8 | 169                               | Figure 1b                      | $h$ is mean depth and is supposed to be constant. But in Figure 2b, two arrow lengths of $h$ : one at ocean boundary and the other at upstream are not same in length. It's just a schematic illustration, but it's nice to be consistent. Also, is $Z$ at ocean boundary always zero as illustrated in |

|    |         |                                                                              |                                                                                                                                                                                                                                                                                                            |
|----|---------|------------------------------------------------------------------------------|------------------------------------------------------------------------------------------------------------------------------------------------------------------------------------------------------------------------------------------------------------------------------------------------------------|
|    |         |                                                                              | Figure 1b? I guess it's very small, but I don't think it's zero. And where is surge level?                                                                                                                                                                                                                 |
| 9  | 170     | Figure 1 caption                                                             | Figure caption should include all parameters in the figure and/or put them in a new table with the note in the caption.                                                                                                                                                                                    |
| 10 | 173     | Equation 5                                                                   | Isn't $u_r$ supposed to be always negative for the coordinate on Figure 1?                                                                                                                                                                                                                                 |
| 11 | 183     | Landward boundary                                                            | The authors mentioned that the landward boundary is extended 100 km to avoid tidal reflection. If so, the landward boundary is where the river discharge was prescribed? What's the size of the domain? It's hard to see that on Figure 1 as there is no scale and no list of parameters and their values. |
| 12 | 184     | Seaward boundary                                                             | What's boundary condition at the seaward boundary? Radiation?                                                                                                                                                                                                                                              |
| 13 | 209     | The presence of river discharge<br>$u_R$                                     | $Q$ is regarded as discharge ( $u=Q/A$ on line 151), but $u_R$ is also defined as discharge here. $u_R$ is velocity in m/s and the discharge is in $m^3/s$ . So I am confused. Please clarify.                                                                                                             |
| 14 | 209-210 | Stronger ebb currents( $u_r+u_T$ )<br>and weaker flood currents( $u_r-u_T$ ) | $u_r$ and $u_T$ are positive landward according to Figure 1, aren't they? If so, flood currents are $-u_r+u_T$ and ebb currents are $-u_r-u_T$ . If that's true, the authors should modify the text. Still stronger ebb currents and weaker flood currents, though. Correct me if I am wrong.              |
| 15 | 215     | Tidal discharge amplitudes                                                   | What are tidal discharge amplitudes?                                                                                                                                                                                                                                                                       |
| 16 | 226     | Tidal amplitude                                                              | $\xi$ was defined as tidal water level elevation (Line 149) and here the authors re-defined $\xi$ as tidal amplitude. Tidal amplitude and tidal elevation are different (only equal when the elevation is the maximum). Better to define it with a different                                               |

|    |         |                                                              |                                                                                                                                                                                                                                                                                                                                                                                                |
|----|---------|--------------------------------------------------------------|------------------------------------------------------------------------------------------------------------------------------------------------------------------------------------------------------------------------------------------------------------------------------------------------------------------------------------------------------------------------------------------------|
|    |         |                                                              | character, e.g. $A_{\text{tide}}$ as $A$ is used as amplitude in the text.                                                                                                                                                                                                                                                                                                                     |
| 17 | 228     | River flow velocity                                          | This should need a clarification. Velocity has a unit in m/s and river flow velocity ( $\theta$ ) has no unit as it is normalized. Maybe you can add 'normalized'?                                                                                                                                                                                                                             |
| 18 | 228-229 | River flow velocity applied at the upstream boundary         | How can you apply normalized flow velocity at the upstream boundary? It is supposed to be a unit of velocity (and height).<br><br>It seems that the authors use river flow velocity (line 228) and river flow ratio (line 231) interchangeably, which also confused me.                                                                                                                        |
| 19 | 253     | $\bar{H}$ is elevation and $\bar{h}$ is the mean water level | The choice of variables is very confusing. In Figure 1, $H$ is the total depth and $h$ is mean water depth. Here $\bar{H}$ is defined as elevation (of what?) and $\bar{h}$ is mean water level. We often assume $\bar{h}$ is mean of $h$ and same for $\bar{H}$ . Suggest to use the variables consistently throughout the texts.                                                             |
| 20 | 255     | Considering the first and third terms in Eq (4), ....        | There is no third term on the right hand and the left hand sides in Eq (4).                                                                                                                                                                                                                                                                                                                    |
| 21 | 257     | Section 2-3                                                  | This section partially include results and discussion that is less related to the validation, but more to the results. The authors may want to consider moving some paragraphs to the result section.                                                                                                                                                                                          |
| 22 | 258     | Tidal amplitude variation                                    | Delete amplitude?                                                                                                                                                                                                                                                                                                                                                                              |
| 23 | 261     | Wave amplitudes                                              | I am a bit confused. First, wave amplitude of what? Second, amplitude is supposed to be constant (e.g. $A_{\text{pri}}$ and $A_{\text{sec}}$ in Eq 6). It seems that the wave amplitudes mentioned here and after this are spatially varying amplitude, not a constant value of amplitude. The authors should clarify this as I am not sure what amplitude the authors are referring to. Maybe |

|    |               |                                                                                |                                                                                                                                                                                                                                                                                                                                                                                                                                                                                                                                     |
|----|---------------|--------------------------------------------------------------------------------|-------------------------------------------------------------------------------------------------------------------------------------------------------------------------------------------------------------------------------------------------------------------------------------------------------------------------------------------------------------------------------------------------------------------------------------------------------------------------------------------------------------------------------------|
|    |               |                                                                                | define a new variable, e.g. $A(x)$ or $A(x,t)$ so that readers are clear about what amplitude the authors are referring to?                                                                                                                                                                                                                                                                                                                                                                                                         |
| 24 | 271           | Figure 3 shows the spatial pattern of the dominant tidal constituent amplitude | Again, M2 amplitude is spatially varying M2 amplitude, not $D_2$ in Table 1? If so, all amplitudes at each grid occurred at the same time stamp? I doubt that all maximum water levels come at the same time at all grid points due to phase lag associated with tidal distortion due to topography and/or friction etc.                                                                                                                                                                                                            |
| 25 | 276           | Figure 3                                                                       | I can see that the difference between numerical model and analytical model is larger between $L^*=0.3-1.0$ for $\theta=1$ , but not for $\theta=0$ . Likewise, I can also see that the difference is larger for $L^*=1.0-1.5$ for $\theta=0$ , but not for $\theta=1$ . Can you please explain why?<br><br>Also, the authors should flip x-axis to be consistent with other figures. It confuses readers.<br><br>Another suggestion: It may be nice to add the extent of $L_e$ and where $b(x)$ is equal to $B_c$ in Figures 3,4,5. |
| 26 | 272, 287, 364 | Figure 3, Figure 4, and Figure 6                                               | Are these figures the model results at what time? Or just maximum value at each point?                                                                                                                                                                                                                                                                                                                                                                                                                                              |
| 27 | 284           | The RMSE between .... Are 0.03, 0.08, 0.09, 0.10.                              | Why does RMSE become larger as the river flow ( $\theta$ ) increases? Please explain.                                                                                                                                                                                                                                                                                                                                                                                                                                               |
| 28 | 288           | Figure 4                                                                       | Is the ocean boundary at $L^*=0$ ? X-axis is different from the one in Figure 3. Should use the consistent axis range (i.e. from 0 to 1.5. Positive values).<br><br>Another questions:<br>1. On (a) with $\theta=1$ , water level from analytical model is larger than the numerical model at                                                                                                                                                                                                                                       |

|    |     |                                  |                                                                                                                                                                                                                                                                                                                                                                                                                                                                                                         |
|----|-----|----------------------------------|---------------------------------------------------------------------------------------------------------------------------------------------------------------------------------------------------------------------------------------------------------------------------------------------------------------------------------------------------------------------------------------------------------------------------------------------------------------------------------------------------------|
|    |     |                                  | <p><math>L^*=-1.5</math>. but smaller near the ocean boundary with the intersection in the middle (<math>L^*\sim-0.8</math>), but it looks like the intersection is shifted landward with decrease in <math>\theta</math>.</p> <p>2. The same trend applies to (b) with shifting the intersection as <math>h</math> increases.</p> <p>Please explain why. The answer to this question along with others I asked will clarify why analytical model and numerical model behaves/responds differently.</p> |
| 29 | 293 | Higher mean water levels ( $Z$ ) | <p>Could this be Higher mean water levels (<math>\bar{h}</math>)?</p> <p>I am not sure if I understand the difference between <math>\bar{h}</math> and <math>Z</math> and also <math>\partial\bar{H}/\partial x</math> and <math>\partial Z/\partial x</math> (or <math>\partial Z/\partial L^*</math>). Both are defined as mean water level and surface slope, respectively.</p>                                                                                                                      |
| 30 | 330 | $Su_{pri}$ time scale            | $Su_{pri}$ period as you use periodic function in eq 6.                                                                                                                                                                                                                                                                                                                                                                                                                                                 |
| 31 | 339 | $A^*$                            | Boundary is ocean boundary or land boundary?                                                                                                                                                                                                                                                                                                                                                                                                                                                            |
| 32 | 346 | Figure 5                         | Y-axis is not amplitude, but surge level or elevation. Amplitude is supposed to be constant.                                                                                                                                                                                                                                                                                                                                                                                                            |
| 33 | 361 | $L^*=1.5$                        | There is no $L^*=1.5$ . $L^*$ ranges from -1.5 to 0. Figure 3, 4, 6 and 8 has different x-axis range. Suggest to use consistent x-axis range for the figures.                                                                                                                                                                                                                                                                                                                                           |
| 34 | 364 | Figure 6                         | Where exactly is $L^*=-1.5$ in Figure 1? Is it where $b(x)=Bc$ or the location of the land boundary where river flow is prescribed? If the latter, it's strange because the authors mentioned that the channel was extended 100 km (line 156) to allow tides to dissipate due to friction and that's where river                                                                                                                                                                                        |

|    |             |                                  |                                                                                                                                                                                                                                                                                                                                                                                                                                                  |
|----|-------------|----------------------------------|--------------------------------------------------------------------------------------------------------------------------------------------------------------------------------------------------------------------------------------------------------------------------------------------------------------------------------------------------------------------------------------------------------------------------------------------------|
|    |             |                                  | <p>flow was prescribed. Am I misunderstanding?</p> <p>Also, <math>\zeta = 1.0 m</math> in the legend. Even if amplitude of primary and secondary surges are combined, the amplitude is not 1.0. Where did <math>\zeta = 1.0 m</math> come from?</p>                                                                                                                                                                                              |
| 35 | 358         | Wave time scale ( $T=1/\omega$ ) | <p>T is also used for bed stress divided by water density on eq 1. Do not use the same name for different variables.</p> <p>Is this the same as wave period? Also, increase in wave period of what? primary or secondary surges? Maybe a subscript (throughout the texts) could be helpful.</p>                                                                                                                                                  |
| 36 | 358 and 364 | Wave amplitude ( $\zeta$ )...    | <p>What wave amplitude is <math>\zeta</math>? I guess <math>\zeta</math> is constant as in the legend of Figure 6. If yes, the amplitude should be noted as A as in Equation 6.</p>                                                                                                                                                                                                                                                              |
| 37 | 358         | Wave time scale                  | Wave period                                                                                                                                                                                                                                                                                                                                                                                                                                      |
| 38 | 372         | A*                               | Use same notation as the one in line 339.                                                                                                                                                                                                                                                                                                                                                                                                        |
| 39 | 394         | Figure 7                         | <p>It is hard to see the contour lines and labels. Use a different color or use a different colormap. A monotonic colormap may help.</p> <p>Also, I am a bit confused with the figures as <math>\theta</math> and <math>\Omega</math> only have 4 numbers in table 1, but the figure looks like there are more data. Did you use shading color (e.g shading interp on MATLAB)? If so, it is better to use flat (no-shading). Please clarify.</p> |
| 40 | 426         | TWL=T+SS+R                       | <p>Have you defined all T, SS, and R in the text? The authors used <math>T=1/\omega</math> (line 358) and it confuses readers with the same variable name, but defined more than once as a different variable. I am confused with the various definitions</p>                                                                                                                                                                                    |

|    |         |                                                                                                |                                                                                                                                                                                                                                                                                                                                                                                                                                                                                                                                                             |
|----|---------|------------------------------------------------------------------------------------------------|-------------------------------------------------------------------------------------------------------------------------------------------------------------------------------------------------------------------------------------------------------------------------------------------------------------------------------------------------------------------------------------------------------------------------------------------------------------------------------------------------------------------------------------------------------------|
|    |         |                                                                                                | from the beginning of the manuscript. Please make them clearly defined.                                                                                                                                                                                                                                                                                                                                                                                                                                                                                     |
| 41 | 435     | Figure 9                                                                                       | Why does tidal and surge amplitude decrease as river flow ( $\theta$ ) increases? Is that a distortion of tide and surge due to non-linear processes as river flow increases? Please explain the details. Also on (a) and (e), the contour of 0.75 looks different at $0.3 < L^* < 1.0$ . Can you add an additional contour e.g. 0.8 or 0.9 to see if the contour on (e) is similar to that on (a)? I think they should be similar as tide, surge, and river look similar between the two depth cases. But if not, what process could cause the difference? |
| 42 | 455     | Estuary boundary                                                                               | Please define estuary boundary in Figure 1.                                                                                                                                                                                                                                                                                                                                                                                                                                                                                                                 |
| 43 | 477     | River effects are larger than marine effects                                                   | “effect” is a vague word. It is unclear to me as to what you mean by effect. Please define it more precisely.                                                                                                                                                                                                                                                                                                                                                                                                                                               |
| 44 | 481     | A decrease in mean river discharge may also cause a landward migration in the crossover point. | I don't get the point. Can you explain why? If this is indeed true, there should be a way to quantify.                                                                                                                                                                                                                                                                                                                                                                                                                                                      |
| 45 | 484     | Long wave amplitudes                                                                           | Are they total amplitudes (primary/secondary surge and tide)?                                                                                                                                                                                                                                                                                                                                                                                                                                                                                               |
| 46 | 489     | Increases in channel depth, wave time scale, and decreased length scale.                       | <p>Could this be “increases in channel depths and wave time scale, and decreases in length scale”?</p> <p>I don't understand what “increases in decreased length scale” mean.</p> <p>Also, wave time scale should be wave period</p> <p>What's the relative importance of each parameter on the total water level?</p>                                                                                                                                                                                                                                      |
| 47 | 497-498 | The transition zone may be sensitive to changes in estuary geometry, such as depth.....        | This should be discussed further quantitatively and your analytical model allows you to do that.                                                                                                                                                                                                                                                                                                                                                                                                                                                            |



|    |     |                                                                |                                                                                                                                                                                                                                                                                                                                                                                                                                                     |
|----|-----|----------------------------------------------------------------|-----------------------------------------------------------------------------------------------------------------------------------------------------------------------------------------------------------------------------------------------------------------------------------------------------------------------------------------------------------------------------------------------------------------------------------------------------|
| 48 | 508 | Section 3.5                                                    | I feel strange to see another model comparison here at the end of the manuscript. The authors compared the analytical model with numerical model on section 2-3 and compared the model again for another idealized model with a different configuration. Though the section provides some new information, I am not convinced that it is necessary to be added as a section. Suggest to remove it or combine it with the validation on section 2-3. |
| 49 | 512 | Idealized numerical modeling of Familkhalili and Thalke (2016) | Is this idealized model different from Delft3D the authors used in this study? If so, please explain what the difference between the two models is and why the authors used a different model. That statement and a brief introduction of the model should be included in the text.                                                                                                                                                                 |
| 50 | 512 | River kilometer (Rkm) 12.                                      | What is Rkm 12?                                                                                                                                                                                                                                                                                                                                                                                                                                     |
| 51 | 514 | Shipping channel was increased                                 | Shipping channel was deepened.                                                                                                                                                                                                                                                                                                                                                                                                                      |
| 52 | 532 | Figure 12                                                      | Why does the analytical model consistently overestimate $A^*$ over the numerical model across all depth settings?                                                                                                                                                                                                                                                                                                                                   |
|    |     |                                                                |                                                                                                                                                                                                                                                                                                                                                                                                                                                     |
|    |     |                                                                |                                                                                                                                                                                                                                                                                                                                                                                                                                                     |
